# Supplementary material for: Novel surface associated polyphosphate bodies sequester uranium in the filamentous, marine cyanobacterium, Anabaena torulosa
Source: Royal Society of Chemistry journal article supplement (doi:10.1039/c3mt00139c), 2013-01-01

## Supplementary figure

**Figure S1.** Uranium and Inorganic phosphate (Pi) in control and U challenged cells.

(A) Cells (equivalent to 0.2 mg dry wt mL<sup>-1</sup>) were assessed for total polyphosphate content and subsequently desorbed using 0.1N HCl or 10mM EDTA (pH 5.0) or (B) exposed to 100 µM uranium for 24h and were assessed for total cell bound uranium or polyphosphate content and subsequently washed using 0.1N HCl or 10mM EDTA (pH 5.0) or by incubation in 1 N HCl at 100°C for 15 min. Polyphosphate or uranium contents were estimated in cell pellets while the phosphate or uranium released were estimated in HCl or EDTA washes.

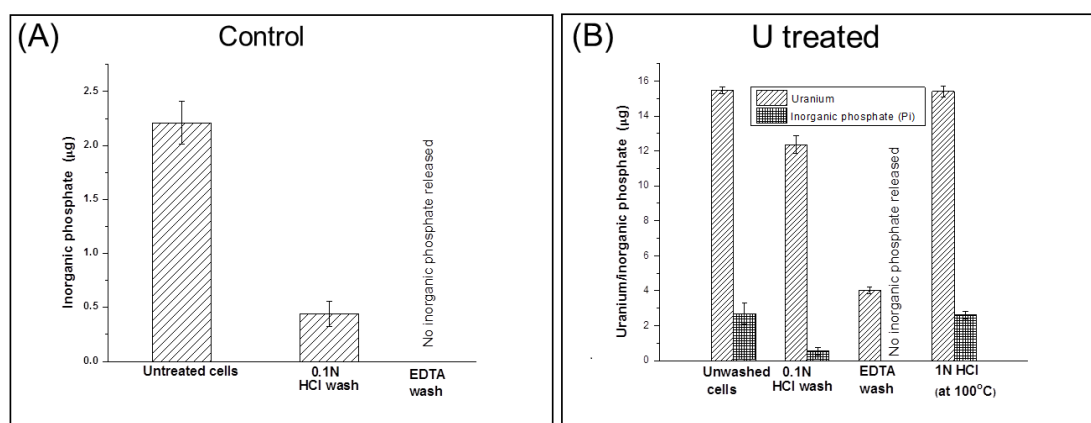

**Figure S2:** Morphology of HCl desorbed U-loaded *A. torulosa* cells. Cells loaded with 77.35mg U g<sup>-1</sup> dry wt. were treated with different concentrations of HCl either at room temperature or at 100°C and observed under white light (A, D, G, J) or in a fluorescence microscope (λexcitation: 520nm, λemission: 680nm) (B, E, H, K) or stained with toulidine blue and observed under white light, (C, F, I, L) in a Carl Zeiss Axioscop 40 microscope, with oil immersion objectives (magnification: 1500X, bars indicate 5 µm).

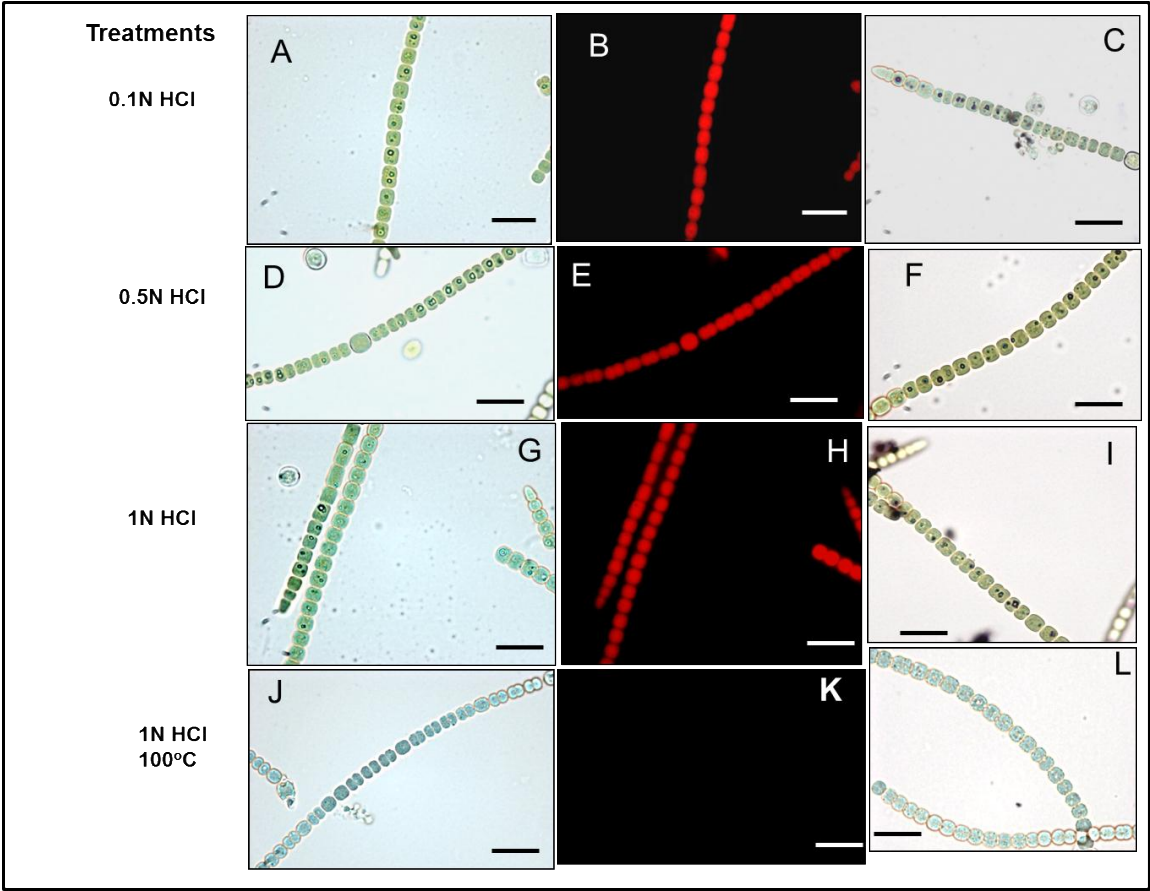

Supplement: c3mt00139c.pdf [file c3mt00139c.pdf]
